# Supplementary material for: Recovery of Energy and Carbon Dioxide from Craft Brewery Wastes for Onsite Use
Source: MDPI journal article supplement (doi:10.3390/fermentation9090831), 2023-09-12
Supplement: s1 [file s1]

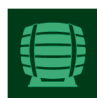**Supplementary Materials:**

## 1. Assumptions made in this study included:

- One beer barrel (BBL) of beer generates 5 BBL (31 gal) of wastewater.
- One barrel of beer requires 0.0012 tons of CO<sub>2</sub>.
- HRT assumed is 10 days.
- The high heating value of methane used in this study is 1011 Btu/ft<sup>3</sup>.
- Waste management cost is estimated at \$48.91 per ton.
- Natural gas cost is assumed to be \$1.00 per therm.
- Electricity cost is set at \$0.07 per kWh.
- The price of CO<sub>2</sub> is considered to be \$100.00 per ton.
- All expenses should be taken into account with a variation of up to 15% in either direction.

## 2. Economic Analysis

The economic viability of a biogas facility is influenced by the processes, design, and size of the facility. To determine baseline capital costs, this study calculated the major expenses associated with each essential process at the biogas facility. Table S1 presents these costs, sourced from the EPA CoEAT model.

**Table S1.** Capital costs for AD plant.

| Major costs for digestion                     | Cost per unit (\$/unit) |
|-----------------------------------------------|-------------------------|
| Software capable of running reports           | \$10,000                |
| PC computer                                   | \$2,000                 |
| Odor control system                           | \$85,000                |
| Pre-processing equipment                      | \$450,000               |
| Pumps                                         | \$90,000                |
| Mixers                                        | \$40,000                |
| Gas collection equipment                      | \$75,000                |
| Monitoring equipment                          | \$100,000               |
| Engineering planning and design               | \$250,000               |
| New full solid waste permit                   | \$6,300                 |
| Land preparation                              | \$30,000                |
| New water service                             | \$110                   |
| Anaerobic digester tank (\$/ft <sup>3</sup> ) | \$27                    |

To validate the feasibility of utilizing the EPA CoEAT model for estimating installation costs of AD plants in craft breweries, the capital costs obtained from the model were compared with data from several real case studies.

**Table S2.** Comparison of capital costs using the CoEAT model and the actual construction costs from real case studies.

|                                                                                          | Case study 1  | Case study 2         | Case study 3         | Case study 4   |
|------------------------------------------------------------------------------------------|---------------|----------------------|----------------------|----------------|
| Name of the brewery                                                                      | Abita Brewing | Matt Brewing Company | Magic Hat Brewing    | Bell's Brewing |
| Location                                                                                 | Covington, LA | Utica, NY            | South Burlington, VT | Kalamazoo, MI  |
| Zip                                                                                      | 70433         | 13502                | 5403                 | 49007          |
| Construction Year                                                                        | 2017          | 2013                 | 2010                 | 2014           |
| Brewery waste amount, gallons/day                                                        | 75,000        | 150,000              | 30,000               | 100,000        |
| Hydraulic retention time (HRT), days                                                     | 10.1          | 10.1                 | 16.4                 | 10.0           |
| Actual construction cost, \$ million                                                     | 1.5           | 5.0                  | 2.7                  | 4.5            |
| CoEAT model results, \$ million in 2022                                                  | 1.8           | 6.2                  | 3.2                  | 4.7            |
| Estimated construction cost based on the ENR construction cost index, \$ million in 2022 | 2.1           | 5.8                  | 3.4                  | 5.1            |
| Percentage difference, %                                                                 | 14.3%         | 6.9%                 | 5.9%                 | 7.8%           |

### 3. Annual income and avoided costs based on different scales of AD.

**Table S3.** Annual income and avoided costs for varying production levels.

| 50,000 barrels                | AD+RNG    | AD+CHP    | CO <sub>2</sub> recovery | AD+RNG+ CO <sub>2</sub> | AD+CHP+CO <sub>2</sub> |
|-------------------------------|-----------|-----------|--------------------------|-------------------------|------------------------|
| Avoided waste management cost | \$ 77,483 | \$ 77,483 | \$ 77,483                | \$ 77,483               | \$ 77,483              |
| Liquid digestate income       | \$ 888    | \$ 888    | \$ 888                   | \$ 888                  | \$ 888                 |
| Avoided electricity costs     | NA        | \$ 1,045  | NA                       | NA                      | \$ 1,045               |
| Avoided natural gas costs     | \$ 517    | NA        | NA                       | \$ 517                  | NA                     |
| Avoided CO <sub>2</sub> costs | NA        | NA        | \$ 880,110               | \$ 880,110              | \$ 880,110             |
| Tax credits                   | \$ 1,879  | \$ 935    | NA                       | \$ 1,879                | \$ 935                 |
| Annual revenue                | \$ 75,771 | \$ 75,348 | \$ 957,481               | \$ 954,881              | \$ 954,458             |

  

| 500,000 barrels               | AD+RNG    | AD+CHP    | CO <sub>2</sub> recovery | AD+RNG+ CO <sub>2</sub> | AD+CHP+CO <sub>2</sub> |
|-------------------------------|-----------|-----------|--------------------------|-------------------------|------------------------|
| Avoided waste management cost | \$774,831 | \$774,831 | \$774,831                | \$774,831               | \$774,831              |
| Liquid digestate income       | \$8,877   | \$8,877   | \$8,877                  | \$8,877                 | \$8,877                |
| Avoided electricity costs     | NA        | \$10,452  | NA                       | NA                      | \$10,452               |
| Avoided natural gas costs     | \$5,170   | NA        | NA                       | \$5,170                 | NA                     |
| Avoided CO <sub>2</sub> costs | NA        | NA        | \$8,801,100              | \$8,801,100             | \$8,801,100            |

|                |           |           |             |             |             |
|----------------|-----------|-----------|-------------|-------------|-------------|
| Tax credits    | \$18,785  | \$9,350   | NA          | \$18,785    | \$9,350     |
| Annual revenue | \$798,206 | \$775,554 | \$9,583,809 | \$9,598,306 | \$9,575,654 |

  

|                               |             |             |                          |                         |                        |
|-------------------------------|-------------|-------------|--------------------------|-------------------------|------------------------|
| 1 million barrels             | AD+RNG      | AD+CHP      | CO <sub>2</sub> recovery | AD+RNG+ CO <sub>2</sub> | AD+CHP+CO <sub>2</sub> |
| Avoided waste management cost | \$1,549,662 | \$1,549,662 | \$1,549,662              | \$1,549,662             | \$1,549,662            |
| Liquid digestate income       | \$17,755    | \$17,755    | \$17,755                 | \$17,755                | \$17,755               |
| Avoided electricity costs     | NA          | \$20,905    | NA                       | NA                      | \$20,905               |
| Avoided natural gas costs     | \$10,340    | NA          | NA                       | \$10,340                | NA                     |
| Avoided CO <sub>2</sub> costs | NA          | NA          | \$17,602,200             | \$17,602,200            | \$17,602,200           |
| Tax credits                   | \$37,571    | \$18,700    | NA                       | \$37,571                | \$18,700               |
| Annual revenue                | \$1,600,912 | \$1,553,561 | \$19,168,617             | \$19,202,112            | \$19,154,761           |

  

|                               |             |             |                          |                         |                        |
|-------------------------------|-------------|-------------|--------------------------|-------------------------|------------------------|
| 2 million barrels             | AD+RNG      | AD+CHP      | CO <sub>2</sub> recovery | AD+RNG+ CO <sub>2</sub> | AD+CHP+CO <sub>2</sub> |
| Avoided waste management cost | \$3,099,325 | \$3,099,325 | \$3,099,325              | \$3,099,325             | \$3,099,325            |
| Liquid digestate income       | \$35,509    | \$35,509    | \$35,509                 | \$35,509                | \$35,509               |
| Avoided electricity costs     | NA          | \$41,809    | NA                       | NA                      | \$41,809               |
| Avoided natural gas costs     | \$20,680    | NA          | NA                       | \$20,680                | NA                     |
| Avoided CO <sub>2</sub> costs | NA          | NA          | \$35,204,400             | \$35,204,400            | \$35,204,400           |
| Tax credits                   | \$75,141    | \$37,400    | NA                       | \$75,141                | \$37,400               |
| Annual revenue                | \$3,206,324 | \$3,109,575 | \$38,338,234             | \$38,409,724            | \$38,312,975           |

  

|                               |             |             |                          |                         |                        |
|-------------------------------|-------------|-------------|--------------------------|-------------------------|------------------------|
| 4 million barrels             | AD+RNG      | AD+CHP      | CO <sub>2</sub> recovery | AD+RNG+ CO <sub>2</sub> | AD+CHP+CO <sub>2</sub> |
| Avoided waste management cost | \$6,198,650 | \$6,198,650 | \$6,198,650              | \$6,198,650             | \$6,198,650            |
| Liquid digestate income       | \$71,018    | \$71,018    | \$71,018                 | \$71,018                | \$71,018               |
| Avoided electricity costs     | NA          | \$83,618    | NA                       | NA                      | \$83,618               |
| Avoided natural gas costs     | \$41,360    | NA          | NA                       | \$41,360                | NA                     |
| Avoided CO <sub>2</sub> costs | NA          | NA          | \$70,408,800             | \$70,408,800            | \$70,408,800           |
| Tax credits                   | \$150,282   | \$74,799    | NA                       | \$150,282               | \$74,799               |
| Annual revenue                | \$6,417,148 | \$6,221,602 | \$76,677,468             | \$76,824,948            | \$76,629,402           |

  

|                               |             |             |                          |                         |                        |
|-------------------------------|-------------|-------------|--------------------------|-------------------------|------------------------|
| 6 million barrels             | AD+RNG      | AD+CHP      | CO <sub>2</sub> recovery | AD+RNG+ CO <sub>2</sub> | AD+CHP+CO <sub>2</sub> |
| Avoided waste management cost | \$9,297,975 | \$9,297,975 | \$9,297,975              | \$9,297,975             | \$9,297,975            |
| Liquid digestate income       | \$106,528   | \$106,528   | \$106,528                | \$106,528               | \$106,528              |
| Avoided electricity costs     | NA          | \$125,427   | NA                       | NA                      | \$125,427              |
| Avoided natural gas costs     | \$62,040    | NA          | NA                       | \$62,040                | NA                     |
| Avoided CO <sub>2</sub> costs | NA          | NA          | \$105,613,200            | \$105,613,200           | \$105,613,200          |

|                |             |             |               |               |               |
|----------------|-------------|-------------|---------------|---------------|---------------|
| Tax credits    | \$225,424   | \$112,199   | NA            | \$225,424     | \$112,199     |
| Annual revenue | \$9,627,971 | \$9,333,630 | \$115,016,703 | \$115,240,171 | \$114,945,830 |

**Table S4.** Comparison of payback period with 20% hops waste and without hops.

| Annual<br>production,<br>barrels | Without hop waste, years |        | With 20% hops waste, years |        | Percentage<br>difference, % |     |
|----------------------------------|--------------------------|--------|----------------------------|--------|-----------------------------|-----|
|                                  | AD+RNG                   | AD+CHP | AD+RNG                     | AD+CHP |                             |     |
| 50,000                           | 43                       | 45.4   | 43.3                       | 45.6   | 0.7                         | 0.4 |
| 500,000                          | 5.3                      | 7.5    | 5.4                        | 7.6    | 1.9                         | 1.3 |
| 1,000,000                        | 3.5                      | 5.5    | 3.4                        | 5.5    | 2.9                         | 0.0 |
| 2,000,000                        | 2.3                      | 4.5    | 2.4                        | 4.5    | 4.2                         | 0.0 |
| 4,000,000                        | 1.9                      | 4      | 1.9                        | 4      | 0.0                         | 0.0 |
| 6,000,000                        | 1.7                      | 3.8    | 1.7                        | 3.8    | 0.0                         | 0.0 |
